# Supplementary material for: MicroRNA 452 Regulates Cell Proliferation, Cell Migration, and Angiogenesis in Colorectal Cancer by Suppressing VEGFA Expression
Source: PubMed Central journal article supplement (PMC6826374; doi:10.3390/cancers11101613), 2019-10-22
Supplement: cancers-11-01613-s001.pdf [file cancers-11-01613-s001.pdf]

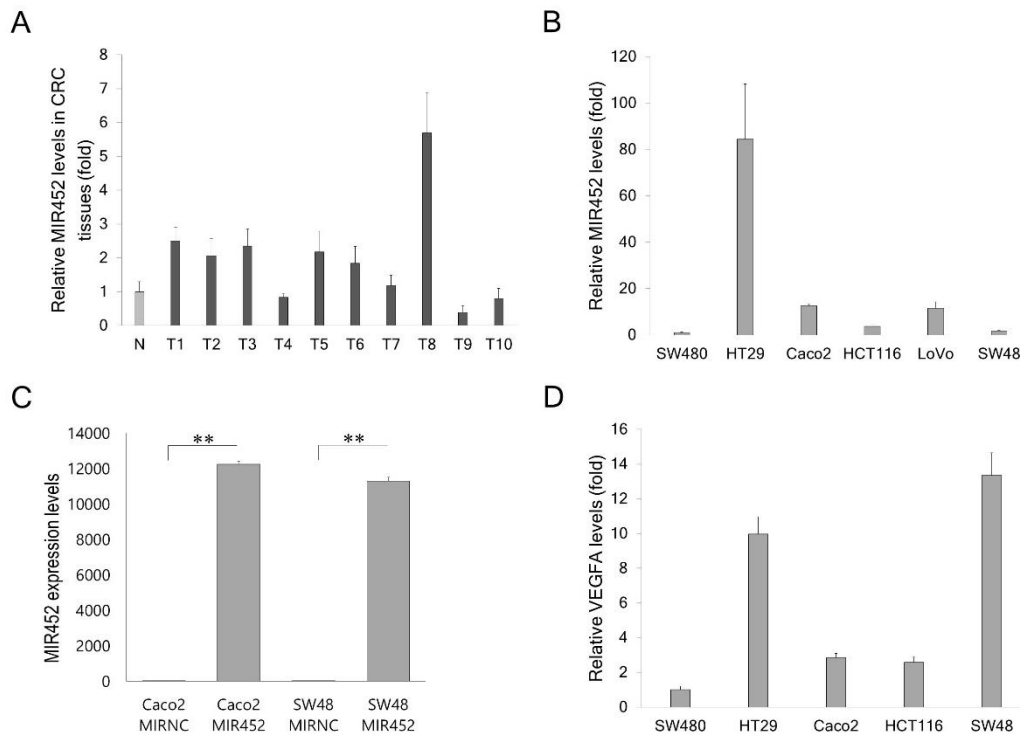

**Figure S1.** Endogenous MIR452 and VEGFA expression in CRC tissues and cell lines. **(A)** The expression of MIR452 was validated using 10 CRC tissue samples and matched normal colon tissue samples. miRNA levels were normalized to colon-specific RNU48. Values are presented as the fold-change in tumor tissue relative levels ( $\Delta\Delta\text{CT}$ ) to normal tissue. **(B)** The relative endogenous MIR452 expression levels in six CRC cell lines. The data are presented as a fold change in HT29, Caco2, HCT116, LoVo, and SW48 cells relative to SW480 cells. This experiment was performed as two independent experiments, each carried out in triplicate. **(C)** MIR452 expression level analysis by qRT-PCR for MIR452 transfection efficiency in Caco2 and SW48 cells. **(D)** The relative endogenous VEGFA expression levels in five CRC cell lines. The data are presented as a fold change in HT29, Caco2, HCT116, or SW48 cells relative to SW480 cells. This experiment was performed three independent experiments, each carried out in duplicate.

**Table S1.** The putative target genes of MIR452 identified and predicted by the microarray analysis from the MIR452 overexpressed cells.

| Symbol  | Definition                                                                             | Accession   |
|---------|----------------------------------------------------------------------------------------|-------------|
| ACOT8   | Homo sapiens acyl-CoA thioesterase 8 (ACOT8), transcript variant 1, mRNA.              | NM_005469.2 |
| ACTR6   | Homo sapiens ARP6 actin-related protein 6 homolog (yeast) (ACTR6), mRNA.               | NM_022496.3 |
| ADI1    | Homo sapiens acireductone dioxygenase 1 (ADI1), mRNA.                                  | NM_018269.1 |
| AFTPH   | Homo sapiens aftiphilin (AFTPH), transcript variant 1, mRNA.                           | NM_203437.2 |
| AHNAK2  | Homo sapiens AHNAK nucleoprotein 2 (AHNAK2), mRNA.                                     | NM_138420.2 |
| AKAP7   | Homo sapiens A kinase (PRKA) anchor protein 7 (AKAP7), transcript variant alpha, mRNA. | NM_004842.2 |
| ANAPC13 | Homo sapiens anaphase promoting complex subunit 13 (ANAPC13), mRNA.                    | NM_015391.2 |
| ANKRD46 | Homo sapiens ankyrin repeat domain 46 (ANKRD46), mRNA.                                 | NM_198401.2 |

|           |                                                                                                             |                    |
|-----------|-------------------------------------------------------------------------------------------------------------|--------------------|
| ANXA4     | Homo sapiens annexin A4 (ANXA4), mRNA.                                                                      | NM_001153.2        |
| ARF4      | Homo sapiens ADP-ribosylation factor 4 (ARF4), mRNA.                                                        | NM_001660.2        |
| ARGLU1    | Homo sapiens arginine and glutamate rich 1 (ARGLU1), mRNA.                                                  | NM_018011.3        |
| ARHGEF11  | Homo sapiens Rho guanine nucleotide exchange factor (GEF) 11 (ARHGEF11), transcript variant 1, mRNA.        | NM_014784.2        |
| ARL6IP1   | Homo sapiens ADP-ribosylation factor-like 6 interacting protein 1 (ARL6IP1), mRNA.                          | NM_015161.1        |
| ASB8      | Homo sapiens ankyrin repeat and SOCS box-containing 8 (ASB8), mRNA.                                         | NM_024095.3        |
| ATMIN     | Homo sapiens ATM interactor (ATMIN), mRNA.                                                                  | NM_015251.2        |
| ATP2B1    | Homo sapiens ATPase, Ca <sup>++</sup> transporting, plasma membrane 1 (ATP2B1), transcript variant 1, mRNA. | NM_00100132<br>3.1 |
| ATP6V0A2  | Homo sapiens ATPase, H <sup>+</sup> transporting, lysosomal V0 subunit a2 (ATP6V0A2), mRNA.                 | NM_012463.2        |
| B4GALT6   | Homo sapiens UDP-Gal:betaGlcNAc beta 1,4-galactosyltransferase, polypeptide 6 (B4GALT6), mRNA.              | NM_004775.2        |
| BCAS2     | Homo sapiens breast carcinoma amplified sequence 2 (BCAS2), mRNA.                                           | NM_005872.2        |
| BCLAF1    | Homo sapiens BCL2-associated transcription factor 1 (BCLAF1), transcript variant 1, mRNA.                   | NM_014739.2        |
| BLOC1S1   | Homo sapiens biogenesis of lysosome-related organelles complex-1, subunit 1 (BLOC1S1), mRNA.                | NM_001487.1        |
| BNIP3L    | Homo sapiens BCL2/adenovirus E1B 19kDa interacting protein 3-like (BNIP3L), mRNA.                           | NM_004331.2        |
| BRMS1L    | Homo sapiens breast cancer metastasis-suppressor 1-like (BRMS1L), mRNA.                                     | NM_032352.3        |
| BTF3L4    | Homo sapiens basic transcription factor 3-like 4 (BTF3L4), mRNA.                                            | NM_152265.2        |
| BTN3A2    | Homo sapiens butyrophilin, subfamily 3, member A2 (BTN3A2), mRNA.                                           | NM_007047.3        |
| BZW1      | Homo sapiens basic leucine zipper and W2 domains 1 (BZW1), mRNA. XM_943165                                  | NM_014670.2        |
| C12orf48  | Homo sapiens chromosome 12 open reading frame 48 (C12orf48), mRNA.                                          | NM_017915.2        |
| C14orf167 | Homo sapiens chromosome 14 open reading frame 167 (C14orf167), transcript variant 1, non-coding RNA.        | NR_023921.1        |
| C1orf56   | Homo sapiens chromosome 1 open reading frame 56 (C1orf56), mRNA.                                            | NM_017860.3        |
| C3orf58   | Homo sapiens chromosome 3 open reading frame 58 (C3orf58), mRNA.                                            | NM_173552.2        |
| C4orf34   | Homo sapiens chromosome 4 open reading frame 34 (C4orf34), mRNA.                                            | NM_174921.1        |
| C6orf62   | Homo sapiens chromosome 6 open reading frame 62 (C6orf62), mRNA.                                            | NM_030939.3        |
| CA9       | Homo sapiens carbonic anhydrase IX (CA9), mRNA.                                                             | NM_001216.1        |
| CAMSAP1L1 | Homo sapiens calmodulin regulated spectrin-associated protein 1-like 1 (CAMSAP1L1), mRNA.                   | NM_203459.1        |
| CASD1     | Homo sapiens CAS1 domain containing 1 (CASD1), mRNA.                                                        | NM_022900.3        |
| CBFB      | Homo sapiens core-binding factor, beta subunit (CBFB), transcript variant 2, mRNA.                          | NM_001755.2        |

|         |                                                                                                                             |                    |
|---------|-----------------------------------------------------------------------------------------------------------------------------|--------------------|
| CCDC61  | Homo sapiens coiled-coil domain containing 61 (CCDC61), mRNA.                                                               | NM_00108040<br>2.1 |
| CCDC90B | Homo sapiens coiled-coil domain containing 90B (CCDC90B), mRNA.                                                             | NM_021825.3        |
| CCNG2   | Homo sapiens cyclin G2 (CCNG2), mRNA.                                                                                       | NM_004354.1        |
| CD164   | Homo sapiens CD164 molecule, sialomucin (CD164), mRNA.                                                                      | NM_006016.3        |
| CDC40   | Homo sapiens cell division cycle 40 homolog ( <i>S. cerevisiae</i> ) (CDC40), mRNA.                                         | NM_015891.2        |
| CDH13   | Homo sapiens cadherin 13, H-cadherin (heart) (CDH13), mRNA.                                                                 | NM_001257.3        |
| CDK5R1  | Homo sapiens cyclin-dependent kinase 5, regulatory subunit 1 (p35) (CDK5R1), mRNA.                                          | NM_003885.2        |
| CEP57   | Homo sapiens centrosomal protein 57kDa (CEP57), mRNA.                                                                       | NM_014679.3        |
| CLDND1  | Homo sapiens claudin domain containing 1 (CLDND1), transcript variant 1, mRNA.                                              | NM_00104018<br>1.1 |
| CLK1    | Homo sapiens CDC-like kinase 1 (CLK1), transcript variant 2, mRNA.                                                          | NM_00102464<br>6.1 |
| CLK4    | Homo sapiens CDC-like kinase 4 (CLK4), mRNA.                                                                                | NM_020666.2        |
| CNBP    | Homo sapiens CCHC-type zinc finger, nucleic acid binding protein (CNBP), mRNA.                                              | NM_003418.1        |
| COPG2   | Homo sapiens coatmer protein complex, subunit gamma 2 (COPG2), mRNA.                                                        | NM_012133.2        |
| COQ10B  | Homo sapiens coenzyme Q10 homolog B ( <i>S. cerevisiae</i> ) (COQ10B), mRNA.                                                | NM_025147.3        |
| CROP    | Homo sapiens cisplatin resistance-associated overexpressed protein (CROP), transcript variant 1, mRNA.                      | NM_016424.3        |
| CWC22   | Homo sapiens CWC22 spliceosome-associated protein homolog ( <i>S. cerevisiae</i> ) (CWC22), mRNA.                           | NM_020943.2        |
| DCUN1D1 | Homo sapiens DCN1, defective in cullin neddylation 1, domain containing 1 ( <i>S. cerevisiae</i> ) (DCUN1D1), mRNA.         | NM_020640.2        |
| DDX17   | Homo sapiens DEAD (Asp-Glu-Ala-Asp) box polypeptide 17 (DDX17), transcript variant 2, mRNA.                                 | NM_030881.2        |
| DERL1   | Homo sapiens Der1-like domain family, member 1 (DERL1), mRNA.                                                               | NM_024295.3        |
| DKK3    | Homo sapiens dickkopf homolog 3 ( <i>Xenopus laevis</i> ) (DKK3), transcript variant 1, mRNA.                               | NM_015881.5        |
| DLEU1   | Homo sapiens deleted in lymphocytic leukemia 1 (non-protein coding) (DLEU1), non-coding RNA.                                | NR_002605.1        |
| DNAJC10 | Homo sapiens DnaJ (Hsp40) homolog, subfamily C, member 10 (DNAJC10), mRNA.                                                  | NM_018981.1        |
| DPM1    | Homo sapiens dolichyl-phosphate mannosyltransferase polypeptide 1, catalytic subunit (DPM1), mRNA.                          | NM_003859.1        |
| DPYSL2  | Homo sapiens dihydropyrimidinase-like 2 (DPYSL2), mRNA.                                                                     | NM_001386.4        |
| DR1     | Homo sapiens down-regulator of transcription 1, TBP-binding (negative cofactor 2) (DR1), mRNA.                              | NM_001938.2        |
| ELOVL5  | Homo sapiens ELOVL family member 5, elongation of long chain fatty acids (FEN1/Elo2, SUR4/Elo3-like, yeast) (ELOVL5), mRNA. | NM_021814.3        |
| ENTPD5  | Homo sapiens ectonucleoside triphosphate diphosphohydrolase 5 (ENTPD5), mRNA.                                               | NM_001249.1        |

|         |                                                                                                                             |                 |
|---------|-----------------------------------------------------------------------------------------------------------------------------|-----------------|
| EPS8    | Homo sapiens epidermal growth factor receptor pathway substrate 8 (EPS8), mRNA.                                             | NM_004447.4     |
| ERRFI1  | Homo sapiens ERBB receptor feedback inhibitor 1 (ERRFI1), mRNA.                                                             | NM_018948.2     |
| F2      | Homo sapiens coagulation factor II (thrombin) (F2), mRNA.                                                                   | NM_000506.3     |
| FAM116A | PREDICTED: Homo sapiens family with sequence similarity 116, member A (FAM116A), mRNA.                                      | XM_001132771.1  |
| FAM134B | Homo sapiens family with sequence similarity 134, member B (FAM134B), transcript variant 1, mRNA.                           | NM_00103485.0.1 |
| FAM150B | Homo sapiens family with sequence similarity 150, member B (FAM150B), mRNA.                                                 | NM_00100291.9.2 |
| FAM162A | Homo sapiens family with sequence similarity 162, member A (FAM162A), mRNA.                                                 | NM_014367.3     |
| FAM8A1  | Homo sapiens family with sequence similarity 8, member A1 (FAM8A1), mRNA.                                                   | NM_016255.1     |
| FANCI   | Homo sapiens Fanconi anemia, complementation group I (FANCI), transcript variant 2, mRNA.                                   | NM_018193.2     |
| FBXW5   | Homo sapiens F-box and WD-40 domain protein 5 (FBXW5), transcript variant 3, mRNA.                                          | NM_178226.1     |
| FNDC3A  | Homo sapiens fibronectin type III domain containing 3A (FNDC3A), transcript variant 1, mRNA.                                | NM_00107967.3.1 |
| FTH1    | Homo sapiens ferritin, heavy polypeptide 1 (FTH1), mRNA.                                                                    | NM_002032.2     |
| FTHL8   | Homo sapiens ferritin, heavy polypeptide-like 8 (FTHL8) on chromosome X.                                                    | NR_002203.1     |
| GABPA   | Homo sapiens GA binding protein transcription factor, alpha subunit 60kDa (GABPA), mRNA.                                    | NM_002040.2     |
| GALNS   | Homo sapiens galactosamine (N-acetyl)-6-sulfate sulfatase (Morquio syndrome, mucopolysaccharidosis type IVA) (GALNS), mRNA. | NM_000512.3     |
| GALNT1  | Homo sapiens UDP-N-acetyl-alpha-D-galactosamine:polypeptide N-acetylgalactosaminyltransferase 1 (GalNAc-T1) (GALNT1), mRNA. | NM_020474.2     |
| GDF15   | Homo sapiens growth differentiation factor 15 (GDF15), mRNA.                                                                | NM_004864.1     |
| GEN1    | Homo sapiens Gen homolog 1, endonuclease (Drosophila) (GEN1), mRNA.                                                         | NM_182625.2     |
| GGPS1   | Homo sapiens geranylgeranyl diphosphate synthase 1 (GGPS1), transcript variant 2, mRNA.                                     | NM_00103727.7.1 |
| GJA3    | Homo sapiens gap junction protein, alpha 3, 46kDa (GJA3), mRNA.                                                             | NM_021954.3     |
| GNA13   | Homo sapiens guanine nucleotide binding protein (G protein), alpha 13 (GNA13), mRNA.                                        | NM_006572.3     |
| GOLPH3L | Homo sapiens golgi phosphoprotein 3-like (GOLPH3L), mRNA.                                                                   | NM_018178.3     |
| GPER    | Homo sapiens G protein-coupled estrogen receptor 1 (GPER), transcript variant 3, mRNA.                                      | NM_00103996.6.1 |
| GTF2E1  | Homo sapiens general transcription factor IIE, polypeptide 1 (alpha subunit, 56kD) (GTF2E1), mRNA.                          | NM_005513.1     |
| GTF2H1  | Homo sapiens general transcription factor IIH, polypeptide 1, 62kDa (GTF2H1), mRNA.                                         | NM_005316.2     |

|              |                                                                                                         |                |
|--------------|---------------------------------------------------------------------------------------------------------|----------------|
| HAT1         | Homo sapiens histone acetyltransferase 1 (HAT1), transcript variant 1, mRNA.                            | NM_003642.2    |
| HIST2H2AA3   | Homo sapiens histone cluster 2, H2aa3 (HIST2H2AA3), mRNA.                                               | NM_003516.2    |
| HK2          | Homo sapiens hexokinase 2 (HK2), mRNA.                                                                  | NM_000189.4    |
| HMGB3        | Homo sapiens high-mobility group box 3 (HMGB3), mRNA.                                                   | NM_005342.2    |
| HNRPH3       | Homo sapiens heterogeneous nuclear ribonucleoprotein H3 (2H9) (HNRPH3), transcript variant 2H9, mRNA.   | NM_012207.1    |
| HSF2BP       | Homo sapiens heat shock transcription factor 2 binding protein (HSF2BP), mRNA.                          | NM_007031.1    |
| HSPA2        | Homo sapiens heat shock 70kDa protein 2 (HSPA2), mRNA.                                                  | NM_021979.2    |
| IGF2BP2      | Homo sapiens insulin-like growth factor 2 mRNA binding protein 2 (IGF2BP2), transcript variant 1, mRNA. | NM_006548.4    |
| IRF8         | Homo sapiens interferon regulatory factor 8 (IRF8), mRNA.                                               | NM_002163.2    |
| ITGAV        | Homo sapiens integrin, alpha V (vitronectin receptor, alpha polypeptide, antigen CD51) (ITGAV), mRNA.   | NM_002210.2    |
| ITGB3BP      | Homo sapiens integrin beta 3 binding protein (beta3-endonexin) (ITGB3BP), mRNA.                         | NM_014288.3    |
| JARID2       | Homo sapiens jumonji, AT rich interactive domain 2 (JARID2), mRNA.                                      | NM_004973.2    |
| KBTBD7       | Homo sapiens kelch repeat and BTB (POZ) domain containing 7 (KBTBD7), mRNA.                             | NM_032138.3    |
| KIAA0261     | Homo sapiens KIAA0261 (KIAA0261), mRNA.                                                                 | NM_015045.1    |
| KIAA0831     | Homo sapiens KIAA0831 (KIAA0831), mRNA.                                                                 | NM_014924.3    |
| KIAA1333     | Homo sapiens KIAA1333 (KIAA1333), mRNA.                                                                 | NM_017769.2    |
| KIF15        | Homo sapiens kinesin family member 15 (KIF15), mRNA.                                                    | NM_020242.1    |
| KLRG1        | Homo sapiens killer cell lectin-like receptor subfamily G, member 1 (KLRG1), mRNA.                      | NM_005810.3    |
| KRCC1        | Homo sapiens lysine-rich coiled-coil 1 (KRCC1), mRNA.                                                   | NM_016618.1    |
| LAMC1        | Homo sapiens laminin, gamma 1 (formerly LAMB2) (LAMC1), mRNA.                                           | NM_002293.2    |
| LCOR         | Homo sapiens ligand dependent nuclear receptor corepressor (LCOR), mRNA.                                | NM_032440.1    |
| LIMCH1       | Homo sapiens LIM and calponin homology domains 1 (LIMCH1), mRNA.                                        | NM_014988.1    |
| LIN7C        | Homo sapiens lin-7 homolog C (C. elegans) (LIN7C), mRNA.                                                | NM_018362.2    |
| LOC100128191 | PREDICTED: Homo sapiens hypothetical protein LOC100128191 (LOC100128191), mRNA.                         | XM_001717944.1 |
| LOC100128309 | PREDICTED: Homo sapiens hypothetical protein LOC100128309 (LOC100128309), mRNA.                         | XM_001717579.1 |
| LOC100128410 | PREDICTED: Homo sapiens misc_RNA (LOC100128410), miscRNA.                                               | XR_037117.1    |
| LOC100129882 | PREDICTED: Homo sapiens similar to mCG49427 (LOC100129882), mRNA.                                       | XM_001716882.1 |
| LOC100130562 | PREDICTED: Homo sapiens hypothetical protein LOC100130562, transcript variant 1 (LOC100130562), mRNA.   | XM_001723702.1 |
| LOC100130624 | PREDICTED: Homo sapiens misc_RNA (LOC100130624), miscRNA.                                               | XR_038453.1    |
| LOC100131609 | PREDICTED: Homo sapiens misc_RNA (LOC100131609), miscRNA.                                               | XR_038433.1    |

|           |                                                                                                                                                                                                                                                                       |                    |
|-----------|-----------------------------------------------------------------------------------------------------------------------------------------------------------------------------------------------------------------------------------------------------------------------|--------------------|
| LOC143543 | Homo sapiens RNA binding motif protein, X-linked pseudogene (LOC143543) on chromosome 11.                                                                                                                                                                             | NR_002197.1        |
| LOC201725 | Homo sapiens hypothetical protein LOC201725 (LOC201725), mRNA.                                                                                                                                                                                                        | NM_00100839<br>3.1 |
| LOC220433 | PREDICTED: Homo sapiens similar to 40S ribosomal protein S4, X isoform (LOC220433), mRNA.                                                                                                                                                                             | XM_941684.2        |
| LOC388076 | PREDICTED: Homo sapiens hypothetical LOC388076 (LOC388076), mRNA.                                                                                                                                                                                                     | XM_001722259<br>.1 |
| LOC388122 | PREDICTED: Homo sapiens hypothetical LOC388122 (LOC388122), mRNA.                                                                                                                                                                                                     | XM_370865.4        |
| LOC390183 | PREDICTED: Homo sapiens misc_RNA (LOC390183), miscRNA.                                                                                                                                                                                                                | XR_018242.2        |
| LOC391370 | PREDICTED: Homo sapiens similar to hCG1818387 (LOC391370), mRNA.                                                                                                                                                                                                      | XM_372926.5        |
| LOC401847 | PREDICTED: Homo sapiens similar to hCG1793095 (LOC401847), mRNA.                                                                                                                                                                                                      | XM_001718486<br>.1 |
| LOC402342 | PREDICTED: Homo sapiens misc_RNA (LOC402342), miscRNA.                                                                                                                                                                                                                | XR_016922.2        |
| LOC440063 | PREDICTED: Homo sapiens misc_RNA (LOC440063), miscRNA.                                                                                                                                                                                                                | XR_018394.2        |
| LOC441506 | PREDICTED: Homo sapiens misc_RNA (LOC441506), miscRNA.                                                                                                                                                                                                                | XR_017565.2        |
| LOC442057 | PREDICTED: Homo sapiens similar to Ciliary dynein heavy chain 11 (Axonemal beta dynein heavy chain 11) (LOC442057), mRNA.                                                                                                                                             | XM_939401.1        |
| LOC642975 | PREDICTED: Homo sapiens misc_RNA (LOC642975), miscRNA.                                                                                                                                                                                                                | XR_036988.1        |
| LOC643308 | PREDICTED: Homo sapiens similar to hCG1810802 (LOC643308), mRNA.                                                                                                                                                                                                      | XR_018294.2        |
| LOC644037 | PREDICTED: Homo sapiens misc_RNA (LOC644037), miscRNA.                                                                                                                                                                                                                | XR_017337.2        |
| LOC645289 | PREDICTED: Homo sapiens similar to CG33096-PA, isoform A (LOC645289), mRNA.                                                                                                                                                                                           | XM_928333.1        |
| LOC645691 | PREDICTED: Homo sapiens similar to heterogeneous nuclear ribonucleoprotein A1 (LOC645691), mRNA.                                                                                                                                                                      | XM_936790.3        |
| LOC645979 | PREDICTED: Homo sapiens similar to ribosomal protein S26 (LOC645979), mRNA.                                                                                                                                                                                           | XM_001721589<br>.1 |
| LOC646300 | PREDICTED: Homo sapiens similar to alpha 3 type VI collagen isoform 1 precursor (LOC646300), mRNA.                                                                                                                                                                    | XM_001130380<br>.1 |
| LOC647346 | PREDICTED: Homo sapiens similar to Alcohol dehydrogenase class 3 chi chain (Alcohol dehydrogenase class III chi chain) (S-(hydroxymethyl)glutathione dehydrogenase) (Glutathione-dependent formaldehyde dehydrogenase) (FDH), transcript variant 1 (LOC647346), mRNA. | XM_936495.2        |
| LOC648210 | PREDICTED: Homo sapiens similar to Heterogeneous nuclear ribonucleoprotein A1 (Helix-destabilizing protein) (Single-strand RNA-binding protein) (hnRNP core protein A1) (HDP) (LOC648210), mRNA.                                                                      | XR_018923.1        |
| LOC648638 | PREDICTED: Homo sapiens similar to Peptidyl-prolyl cis-trans isomerase NIMA-interacting 4 (Rotamase Pin4) (PPIase                                                                                                                                                     | XM_937706.1        |

|           |                                                                                                                                                                                                  |                    |
|-----------|--------------------------------------------------------------------------------------------------------------------------------------------------------------------------------------------------|--------------------|
|           | Pin4) (Parvulin 14) (Par14) (Peptidyl-prolyl cis/trans isomerase EPVH) (hPar14) (LOC648638), mRNA.                                                                                               |                    |
| LOC648742 | PREDICTED: Homo sapiens similar to growth suppressor related (LOC648742), mRNA.                                                                                                                  | XM_001714210<br>.1 |
| LOC653778 | PREDICTED: Homo sapiens similar to solute carrier family 25, member 37 (LOC653778), mRNA.                                                                                                        | XM_929667.1        |
| LOC727962 | PREDICTED: Homo sapiens hypothetical LOC727962 (LOC727962), mRNA.                                                                                                                                | XM_001718648<br>.1 |
| LOC728026 | PREDICTED: Homo sapiens hypothetical LOC728026 (LOC728026), mRNA.                                                                                                                                | XM_001126659<br>.2 |
| LOC728115 | PREDICTED: Homo sapiens misc_RNA (LOC728115), miscRNA.                                                                                                                                           | XR_038319.1        |
| LOC728467 | PREDICTED: Homo sapiens misc_RNA (LOC728467), miscRNA.                                                                                                                                           | XR_039554.1        |
| LOC728481 | PREDICTED: Homo sapiens similar to similar to RPL23AP7 protein (LOC728481), mRNA.                                                                                                                | XR_015292.1        |
| LOC728484 | PREDICTED: Homo sapiens misc_RNA (LOC728484), miscRNA.                                                                                                                                           | XR_015270.2        |
| LOC728643 | Homo sapiens heterogeneous nuclear ribonucleoprotein A1 pseudogene (LOC728643), non-coding RNA.                                                                                                  | NR_003277.1        |
| LOC728643 | Homo sapiens heterogeneous nuclear ribonucleoprotein A1 pseudogene (LOC728643), non-coding RNA.                                                                                                  | NR_003277.1        |
| LOC728732 | PREDICTED: Homo sapiens misc_RNA (LOC728732), miscRNA.                                                                                                                                           | XR_038331.1        |
| LOC729020 | PREDICTED: Homo sapiens rcRPE (LOC729020), mRNA.                                                                                                                                                 | XM_001723111<br>.1 |
| LOC729423 | PREDICTED: Homo sapiens similar to Heterogeneous nuclear ribonucleoprotein A1 (Helix-destabilizing protein) (Single-strand RNA-binding protein) (hnRNP core protein A1) (HDP) (LOC729423), mRNA. | XM_001726948<br>.1 |
| LOC729686 | PREDICTED: Homo sapiens misc_RNA (LOC729686), miscRNA.                                                                                                                                           | XR_039373.1        |
| LOC729832 | PREDICTED: Homo sapiens hypothetical LOC729832 (LOC729832), mRNA.                                                                                                                                | XM_001715603<br>.1 |
| LOC729952 | PREDICTED: Homo sapiens misc_RNA (LOC729952), miscRNA.                                                                                                                                           | XR_015724.2        |
| LOC731751 | PREDICTED: Homo sapiens similar to protein kinase, DNA-activated, catalytic polypeptide (LOC731751), mRNA.                                                                                       | XM_001129414<br>.1 |
| LOC732165 | PREDICTED: Homo sapiens similar to Triosephosphate isomerase (TIM) (Triose-phosphate isomerase), transcript variant 2 (LOC732165), mRNA.                                                         | XM_001134259<br>.1 |
| LONP2     | Homo sapiens lon peptidase 2, peroxisomal (LONP2), mRNA.                                                                                                                                         | NM_031490.2        |
| LYZ       | Homo sapiens lysozyme (renal amyloidosis) (LYZ), mRNA.                                                                                                                                           | NM_000239.1        |
| MAP2K5    | Homo sapiens mitogen-activated protein kinase kinase 5 (MAP2K5), transcript variant A, mRNA.                                                                                                     | NM_145160.1        |
| MAP3K1    | Homo sapiens mitogen-activated protein kinase kinase kinase 1 (MAP3K1), mRNA.                                                                                                                    | NM_005921.1        |
| MDC1      | Homo sapiens mediator of DNA damage checkpoint 1 (MDC1), mRNA.                                                                                                                                   | NM_014641.1        |
| METTL10   | Homo sapiens methyltransferase like 10 (METTL10), mRNA.                                                                                                                                          | NM_212554.2        |

|          |                                                                                                                                                  |                    |
|----------|--------------------------------------------------------------------------------------------------------------------------------------------------|--------------------|
| MFSD6    | Homo sapiens major facilitator superfamily domain containing 6 (MFSD6), mRNA.                                                                    | NM_017694.3        |
| MGC10701 | PREDICTED: Homo sapiens hypothetical protein MGC10701 (MGC10701), mRNA.                                                                          | XM_938766.1        |
| MGC87895 | PREDICTED: Homo sapiens similar to ribosomal protein S14 (MGC87895), mRNA.                                                                       | XM_942712.3        |
| MOSPD1   | Homo sapiens motile sperm domain containing 1 (MOSPD1), mRNA.                                                                                    | NM_019556.1        |
| MTDH     | Homo sapiens metadherin (MTDH), mRNA.                                                                                                            | NM_178812.2        |
| MTFR1    | Homo sapiens mitochondrial fission regulator 1 (MTFR1), nuclear gene encoding mitochondrial protein, mRNA.                                       | NM_014637.2        |
| MX1      | Homo sapiens myxovirus (influenza virus) resistance 1, interferon-inducible protein p78 (mouse) (MX1), mRNA.                                     | NM_002462.2        |
| MXI1     | Homo sapiens MAX interactor 1 (MXI1), transcript variant 2, mRNA.                                                                                | NM_130439.3        |
| MYL7     | Homo sapiens myosin, light chain 7, regulatory (MYL7), mRNA.                                                                                     | NM_021223.2        |
| MYO10    | Homo sapiens myosin X (MYO10), mRNA.                                                                                                             | NM_012334.1        |
| MYO1B    | Homo sapiens myosin IB (MYO1B), mRNA.                                                                                                            | NM_012223.2        |
| NACAP1   | Homo sapiens nascent-polypeptide-associated complex alpha polypeptide pseudogene 1 (NACAP1), non-coding RNA.                                     | NR_002182.1        |
| NBPF3    | Homo sapiens neuroblastoma breakpoint family, member 3 (NBPF3), mRNA.                                                                            | NM_032264.2        |
| NDUFAB1  | Homo sapiens NADH dehydrogenase (ubiquinone) 1, alpha/beta subcomplex, 1, 8kDa (NDUFAB1), mRNA.                                                  | NM_005003.2        |
| NLK      | Homo sapiens nemo-like kinase (NLK), mRNA.                                                                                                       | NM_016231.4        |
| NOC3L    | Homo sapiens nucleolar complex associated 3 homolog (S. cerevisiae) (NOC3L), mRNA.                                                               | NM_022451.9        |
| NOL8     | Homo sapiens nucleolar protein 8 (NOL8), mRNA.                                                                                                   | NM_017948.4        |
| NUF2     | Homo sapiens NUF2, NDC80 kinetochore complex component, homolog (S. cerevisiae) (NUF2), transcript variant 2, mRNA.                              | NM_031423.3        |
| OAZ2     | Homo sapiens ornithine decarboxylase antizyme 2 (OAZ2), mRNA.                                                                                    | NM_002537.2        |
| OPTN     | Homo sapiens optineurin (OPTN), transcript variant 4, mRNA.                                                                                      | NM_00100821<br>3.1 |
| P4HA1    | Homo sapiens procollagen-proline, 2-oxoglutarate 4-dioxygenase (proline 4-hydroxylase), alpha polypeptide I (P4HA1), transcript variant 1, mRNA. | NM_000917.2        |
| PER2     | Homo sapiens period homolog 2 (Drosophila) (PER2), mRNA.                                                                                         | NM_022817.2        |
| PIBF1    | Homo sapiens progesterone immunomodulatory binding factor 1 (PIBF1), mRNA.                                                                       | NM_006346.2        |
| PIK3CA   | Homo sapiens phosphoinositide-3-kinase, catalytic, alpha polypeptide (PIK3CA), mRNA.                                                             | NM_006218.2        |
| PJA2     | Homo sapiens praja 2, RING-H2 motif containing (PJA2), mRNA.                                                                                     | NM_014819.3        |
| PKN2     | Homo sapiens protein kinase N2 (PKN2), mRNA.                                                                                                     | NM_006256.2        |
| PLA2G4D  | Homo sapiens phospholipase A2, group IVD (cytosolic) (PLA2G4D), mRNA.                                                                            | NM_178034.3        |



|         |                                                                                                                                                  |                |
|---------|--------------------------------------------------------------------------------------------------------------------------------------------------|----------------|
| PLEKHA1 | Homo sapiens pleckstrin homology domain containing, family A (phosphoinositide binding specific) member 1 (PLEKHA1), transcript variant 2, mRNA. | NM_001001974.1 |
| PNRC2   | Homo sapiens proline-rich nuclear receptor coactivator 2 (PNRC2), mRNA.                                                                          | NM_017761.2    |
| PPA2    | Homo sapiens pyrophosphatase (inorganic) 2 (PPA2), nuclear gene encoding mitochondrial protein, transcript variant 3, mRNA.                      | NM_176866.2    |
| PPAPDC2 | Homo sapiens phosphatidic acid phosphatase type 2 domain containing 2 (PPAPDC2), mRNA.                                                           | NM_203453.2    |
| PPHLN1  | Homo sapiens periphilin 1 (PPHLN1), transcript variant 1, mRNA.                                                                                  | NM_016488.5    |
| PPL     | Homo sapiens periplakin (PPL), mRNA.                                                                                                             | NM_002705.4    |
| PRR15   | Homo sapiens proline rich 15 (PRR15), mRNA.                                                                                                      | NM_175887.2    |
| PTBP2   | Homo sapiens polypyrimidine tract binding protein 2 (PTBP2), mRNA.                                                                               | NM_021190.1    |
| PTGES3  | Homo sapiens prostaglandin E synthase 3 (cytosolic) (PTGES3), mRNA.                                                                              | NM_006601.4    |
| PTMA    | Homo sapiens prothymosin, alpha (PTMA), transcript variant 1, mRNA.                                                                              | NM_001099285.1 |
| PTP4A1  | Homo sapiens protein tyrosine phosphatase type IVA, member 1 (PTP4A1), mRNA.                                                                     | NM_003463.3    |
| PURA    | Homo sapiens purine-rich element binding protein A (PURA), mRNA.                                                                                 | NM_005859.3    |
| QSOX1   | Homo sapiens quiescin Q6 sulfhydryl oxidase 1 (QSOX1), transcript variant 2, mRNA.                                                               | NM_001004128.2 |
| RAB6A   | Homo sapiens RAB6A, member RAS oncogene family (RAB6A), transcript variant 2, mRNA.                                                              | NM_198896.1    |
| RAD21   | Homo sapiens RAD21 homolog (S. pombe) (RAD21), mRNA.                                                                                             | NM_006265.1    |
| RELL1   | Homo sapiens RELT-like 1 (RELL1), transcript variant 1, mRNA.                                                                                    | NM_001085400.1 |
| RIMBP2  | Homo sapiens RIMS binding protein 2 (RIMBP2), mRNA.                                                                                              | NM_015347.3    |
| RIN2    | Homo sapiens Ras and Rab interactor 2 (RIN2), mRNA.                                                                                              | NM_018993.2    |
| RMI1    | Homo sapiens RMI1, RecQ mediated genome instability 1, homolog (S. cerevisiae) (RMI1), mRNA.                                                     | NM_024945.2    |
| RN5S9   | Homo sapiens RNA, 5S ribosomal 9 (RN5S9), ribosomal RNA.                                                                                         | NR_023371.1    |
| RNF145  | Homo sapiens ring finger protein 145 (RNF145), mRNA.                                                                                             | NM_144726.1    |
| RNF20   | Homo sapiens ring finger protein 20 (RNF20), mRNA.                                                                                               | NM_019592.5    |
| RNPEPL1 | Homo sapiens arginyl aminopeptidase (aminopeptidase B)-like 1 (RNPEPL1), mRNA.                                                                   | NM_018226.3    |
| RPL14   | Homo sapiens ribosomal protein L14 (RPL14), transcript variant 1, mRNA.                                                                          | NM_001034996.1 |
| RPL9    | Homo sapiens ribosomal protein L9 (RPL9), transcript variant 2, mRNA.                                                                            | NM_001024921.2 |
| RSBN1   | Homo sapiens round spermatid basic protein 1 (RSBN1), mRNA.                                                                                      | NM_018364.3    |
| RTN3    | Homo sapiens reticulon 3 (RTN3), transcript variant 1, mRNA.                                                                                     | NM_006054.2    |
| S100A4  | Homo sapiens S100 calcium binding protein A4 (S100A4), transcript variant 2, mRNA.                                                               | NM_019554.2    |

|          |                                                                                                                                                       |                    |
|----------|-------------------------------------------------------------------------------------------------------------------------------------------------------|--------------------|
| SAV1     | Homo sapiens salvador homolog 1 (Drosophila) (SAV1), mRNA.                                                                                            | NM_021818.2        |
| SEC24A   | Homo sapiens SEC24 family, member A (S. cerevisiae) (SEC24A), mRNA.                                                                                   | NM_021982.1        |
| SERINC1  | Homo sapiens serine incorporator 1 (SERINC1), mRNA.                                                                                                   | NM_020755.2        |
| SFPQ     | Homo sapiens splicing factor proline/glutamine-rich (polypyrimidine tract binding protein associated) (SFPQ), mRNA.                                   | NM_005066.1        |
| SFRS11   | Homo sapiens splicing factor, arginine/serine-rich 11 (SFRS11), mRNA.                                                                                 | NM_004768.2        |
| SKIL     | Homo sapiens SKI-like oncogene (SKIL), mRNA.                                                                                                          | NM_005414.2        |
| SLC22A5  | Homo sapiens solute carrier family 22 (organic cation transporter), member 5 (SLC22A5), mRNA.                                                         | NM_003060.2        |
| SLC35F5  | Homo sapiens solute carrier family 35, member F5 (SLC35F5), mRNA.                                                                                     | NM_025181.2        |
| SLC38A2  | Homo sapiens solute carrier family 38, member 2 (SLC38A2), mRNA.                                                                                      | NM_018976.3        |
| SLC39A10 | Homo sapiens solute carrier family 39 (zinc transporter), member 10 (SLC39A10), mRNA.                                                                 | NM_020342.1        |
| SMARCA1  | Homo sapiens SWI/SNF related, matrix associated, actin dependent regulator of chromatin, subfamily a, member 1 (SMARCA1), transcript variant 1, mRNA. | NM_003069.2        |
| SP3      | Homo sapiens Sp3 transcription factor (SP3), transcript variant 2, mRNA.                                                                              | NM_00101737<br>1.3 |
| SPATA7   | Homo sapiens spermatogenesis associated 7 (SPATA7), transcript variant 1, mRNA.                                                                       | NM_018418.2        |
| STC1     | Homo sapiens stanniocalcin 1 (STC1), mRNA.                                                                                                            | NM_003155.2        |
| SUMO1P3  | Homo sapiens SUMO1 pseudogene 3 (SUMO1P3), non-coding RNA.                                                                                            | NR_002190.1        |
| TAF1D    | Homo sapiens TATA box binding protein (TBP)-associated factor, RNA polymerase I, D, 41kDa (TAF1D), mRNA.                                              | NM_024116.2        |
| TAF5L    | Homo sapiens TAF5-like RNA polymerase II, p300/CBP-associated factor (PCAF)-associated factor, 65kDa (TAF5L), transcript variant 2, mRNA.             | NM_00102524<br>7.1 |
| TAGLN    | Homo sapiens transgelin (TAGLN), transcript variant 2, mRNA.                                                                                          | NM_003186.3        |
| TATDN1   | Homo sapiens TatD DNase domain containing 1 (TATDN1), mRNA.                                                                                           | NM_032026.2        |
| TEF      | Homo sapiens thyrotrophic embryonic factor (TEF), transcript variant 1, mRNA.                                                                         | NM_003216.2        |
| TGDS     | Homo sapiens TDP-glucose 4,6-dehydratase (TGDS), mRNA.                                                                                                | NM_014305.2        |
| THNSL2   | Homo sapiens threonine synthase-like 2 (S. cerevisiae) (THNSL2), mRNA.                                                                                | NM_018271.3        |
| THUMPD1  | Homo sapiens THUMP domain containing 1 (THUMPD1), mRNA.                                                                                               | NM_017736.3        |
| THUMPD1  | Homo sapiens THUMP domain containing 1 (THUMPD1), mRNA.                                                                                               | NM_017736.3        |
| THUMPD1  | Homo sapiens THUMP domain containing 1 (THUMPD1), mRNA.                                                                                               | NM_017736.3        |
| TIMP3    | Homo sapiens TIMP metalloproteinase inhibitor 3 (TIMP3), mRNA.                                                                                        | NM_000362.4        |

|          |                                                                                                              |             |
|----------|--------------------------------------------------------------------------------------------------------------|-------------|
| TMEM147  | Homo sapiens transmembrane protein 147 (TMEM147), mRNA.                                                      | NM_032635.2 |
| TMEM14B  | Homo sapiens transmembrane protein 14B (TMEM14B), mRNA.                                                      | NM_030969.2 |
| TMEM184C | Homo sapiens transmembrane protein 184C (TMEM184C), mRNA.                                                    | NM_018241.2 |
| TMPRSS2  | Homo sapiens transmembrane protease, serine 2 (TMPRSS2), mRNA.                                               | NM_005656.2 |
| TNNC1    | Homo sapiens troponin C type 1 (slow) (TNNC1), mRNA.                                                         | NM_003280.1 |
| TRAPPC2  | Homo sapiens trafficking protein particle complex 2 (TRAPPC2), transcript variant 2, mRNA.                   | NM_014563.3 |
| TRIT1    | Homo sapiens tRNA isopentenyltransferase 1 (TRIT1), mRNA.                                                    | NM_017646.3 |
| UBE2J2   | Homo sapiens ubiquitin-conjugating enzyme E2, J2 (UBC6 homolog, yeast) (UBE2J2), transcript variant 1, mRNA. | NM_194315.1 |
| UBQLN2   | Homo sapiens ubiquilin 2 (UBQLN2), mRNA.                                                                     | NM_013444.2 |
| UGP2     | Homo sapiens UDP-glucose pyrophosphorylase 2 (UGP2), transcript variant 1, mRNA.                             | NM_006759.3 |
| VEGFA    | Homo sapiens vascular endothelial growth factor A (VEGFA), transcript variant 2, mRNA.                       | NM_003376.4 |
| WTAP     | Homo sapiens Wilms tumor 1 associated protein (WTAP), transcript variant 1, mRNA.                            | NM_004906.3 |
| YAP1     | Homo sapiens Yes-associated protein 1, 65kDa (YAP1), mRNA.                                                   | NM_006106.2 |
| YIPF4    | Homo sapiens Yip1 domain family, member 4 (YIPF4), mRNA.                                                     | NM_032312.2 |
| ZAK      | Homo sapiens sterile alpha motif and leucine zipper containing kinase AZK (ZAK), transcript variant 2, mRNA. | NM_133646.2 |
| ZNF217   | Homo sapiens zinc finger protein 217 (ZNF217), mRNA.                                                         | NM_006526.2 |
|          | Homo sapiens cDNA FLJ32174 fis, clone PLACE6001064                                                           | AK056736    |

**Table S2.** Primer sequences used for PCR amplification and luciferase assay in this study.

| <b>Applications</b>           | <b>Primers</b> | <b>Primer sequence (5' → 3')</b>                               |
|-------------------------------|----------------|----------------------------------------------------------------|
| qRT-PCR                       | VEGFA-HF       | GGGCAGAATCATCACGAAGT                                           |
|                               | VEGFA-HR       | TGGTGATGTTGGACTCCTCA                                           |
|                               | GAPDH-HF       | TCACCATCTTCCAGGAGCGAGA                                         |
|                               | GAPDH-HR       | TCACTGGCATGGCCTTCCGTG                                          |
| Luciferase assay              | VEGFA-WF       | CAGGAGCTCTCCCGAGGCACAGAGAGACA                                  |
|                               | VEGFA-WR       | CAGCTCGAGACTGTCACCGATCAGGGAG                                   |
|                               | VEGFA-MF       | AGAAATTAGGGTCTCCAATTTAATTAAGAG                                 |
|                               | VEGFA-MR       | CTCTTTAATTAATTTGGAGACCCTAATTTCT                                |
| Taq-Man analysis<br>(FAM-NFQ) | RNU48          | GATGACCCCAGGTA ACTCTGAGTGTGTCGC<br>TGATGCCATCACCGCAGCGCTCTGACC |
|                               | hsa-mir-452    | AACUGUUUGCAGAGGAAACUGA                                         |
